# Supplementary material
Source: PubMed Central journal article supplement (PMC3684844)
Supplement: supp_113.203265_JPET203265_supplement.pdf [file supp_113.203265_JPET203265_supplement.pdf]

David M. Klein, Kristen K. Evans, Rhiannon N. Hardwick, William H. Dantzler, Stephen H. Wright, Nathan J. Cherrington Basolateral "Uptake of Nucleosides by Sertoli Cells is Mediated Primarily by Equilibrative Nucleoside Transporter 1 (ENT1)." *The Journal of Pharmacology and Experimental Therapeutics*

Table 1

List of oligonucleotide probes generated for the analysis of mRNA expression of CNT3

---

**Capture Extenders**

cattgaagaacgtctgtagcctatTTTTTctcttggaagaaagt  
cgatggtctccgagcgaaTTTTTctcttggaagaaagt  
cgcttctggacggagctatagTTTTTctcttggaagaaagt  
atgccagcgatgcaggcTTTTTctcttggaagaaagt

**Label Extenders**

gagtttggcgaccataaatctgTTTTTaggcataggaccggtgtct  
agagtggtcataagccacaaattTTTTTaggcataggaccggtgtct  
gcttctcaaatgatgaatttgTTTTTaggcataggaccggtgtct  
tcacaaattgggtccagccTTTTTaggcataggaccggtgtct  
ttgacatatattgctgcacacatTTTTTaggcataggaccggtgtct  
aaccacagagggcgtaagtgtTTTTTaggcataggaccggtgtct  
acgtaagtcaccgatcactattcTTTTTaggcataggaccggtgtct  
ggctcccagggaatgtctTTTTTaggcataggaccggtgtct  
ccagcaatcagggtctctatTTTTTaggcataggaccggtgtct  
ctaggaacccaaaattggcaa  
gtcatgaagcaggcaatggtc

**Blockers**

ctaggaacccaaaattggcaa  
gtcatgaagcaggcaatggtc
